## **Engineered Cpf1 Enzymes with Altered PAM Specificities**

Linyi Gao<sup>1,2</sup>, David B.T. Cox<sup>1,3,4</sup>, Winston X. Yan<sup>1,4,5</sup>, John Manteiga<sup>3</sup>, Martin Schneider<sup>1</sup>,  
Takashi Yamano<sup>6</sup>, Hiroshi Nishimasu<sup>6,7</sup>, Osamu Nureki<sup>6</sup>, and Feng Zhang<sup>1,2,8,9,\*</sup>

<sup>1</sup> Broad Institute of MIT and Harvard  
Cambridge, Massachusetts 02142, USA

<sup>2</sup> Department of Biological Engineering

<sup>3</sup> Department of Biology  
Massachusetts Institute of Technology  
Cambridge, MA 02139, USA

<sup>4</sup> Harvard-MIT Division of Health Sciences and Technology

<sup>5</sup> Graduate Program in Biophysics  
Harvard Medical School  
Boston, MA 02115, USA

<sup>6</sup> Department of Biological Sciences, Graduate School of Science

The University of Tokyo, Tokyo 113-0032, Japan

<sup>7</sup> JST, PRESTO, Tokyo 113-0032, Japan

<sup>8</sup> McGovern Institute for Brain Research

<sup>9</sup> Department of Brain and Cognitive Sciences  
Massachusetts Institute of Technology  
Cambridge, MA 02139, USA

\* Correspondence should be addressed to [zhang@broadinstitute.org](mailto:zhang@broadinstitute.org) (F.Z.).

# Supplementary Figure 1

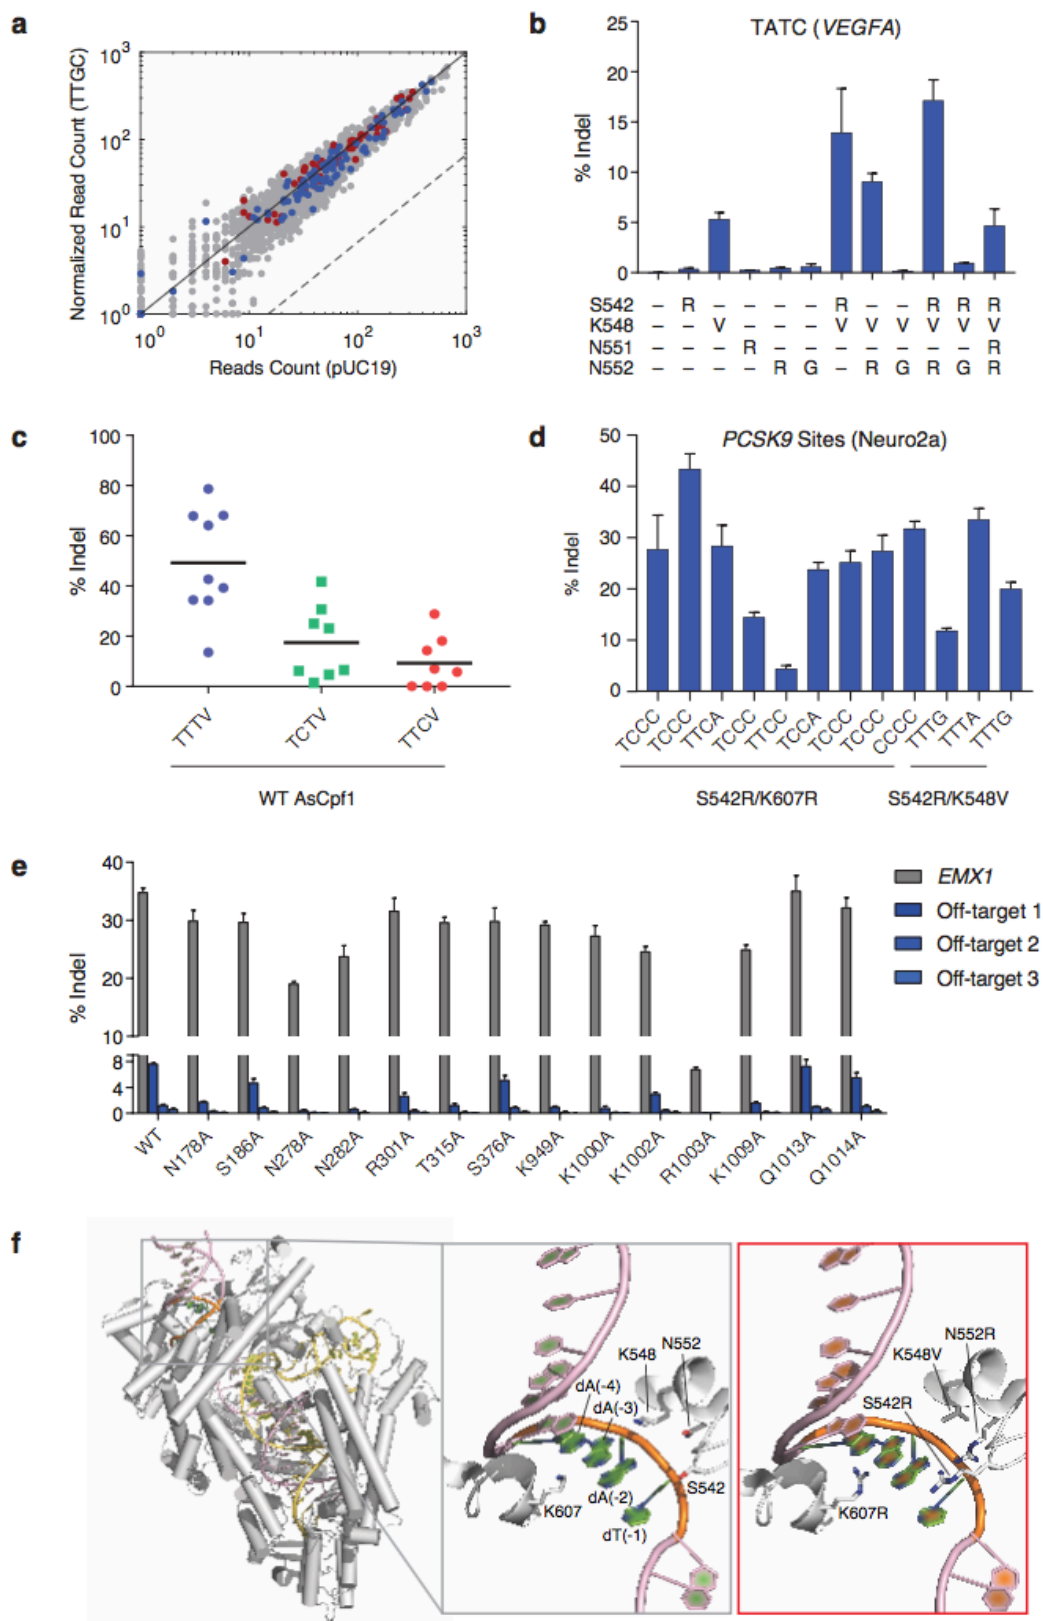

**Supplementary Figure 1** | (a) Bacterial selection screen readout for a TTGC PAM, highlighting depleted hits. Each dot represents a distinct Cpf1 wild-type (WT) or mutant codon. The dashed line indicates 15-fold depletion. Red = stop codon; blue = WT codon. (b) Combinatorial mutagenesis of top single amino acid mutations identified in the bacterial selection screen at a TATC target site in HEK293 cells. (c) Activity of WT AsCpf1 at TTTV, TCTV, and TTCV sites targeting *CFTR*, *EMX1*, *DNMT1*, and *VEGFA* in HEK293 cells. For TCTV and TTCV PAMs, the data shown is replotted from Fig. 2H. (d) Activity of the S542R/K607R variant at TYCV and CCCC target sites within *PCSK9* in Neuro2a cells. (e) Specificity mutagenesis of AsCpf1 using an alanine scan of residues hypothesized to contact one of the two strands of DNA that is unwound during Cpf1 binding and cleavage. (f) Crystal structure of AsCpf1, highlighting the S542, K548, N552 and K607 residues (gray inset) and *in silico* modeled mutations (red inset).

**Supplementary Table 1** | List of residues mutated in the bacterial selection screen.

| #  | Residue | Position | Domain | #  | Res. | Pos. | Domain | #  | Res. | Pos. | Domain |
|----|---------|----------|--------|----|------|------|--------|----|------|------|--------|
| 1  | K       | 130      | REC1   | 23 | Q    | 536  | WED-II | 47 | F    | 598  | PI     |
| 2  | G       | 131      | REC1   | 24 | M    | 537  | WED-II | 48 | P    | 599  | PI     |
| 3  | L       | 132      | REC1   | 25 | P    | 538  | WED-II | 49 | D    | 600  | PI     |
| 4  | F       | 133      | REC1   | 26 | T    | 539  | WED-II | 50 | A    | 601  | PI     |
| 5  | K       | 134      | REC1   | 27 | L    | 540  | WED-II | 51 | A    | 602  | PI     |
| 6  | A       | 135      | REC1   | 28 | A    | 541  | WED-II | 52 | K    | 603  | PI     |
| 7  | F       | 162      | REC1   | 29 | S    | 542  | WED-II | 53 | M    | 604  | PI     |
| 8  | D       | 163      | REC1   | 30 | G    | 543  | WED-II | 54 | I    | 605  | PI     |
| 9  | K       | 164      | REC1   | 31 | W    | 544  | WED-II | 55 | P    | 606  | PI     |
| 10 | F       | 165      | REC1   | 32 | D    | 545  | WED-II | 56 | K    | 607  | PI     |
| 11 | T       | 166      | REC1   | 33 | V    | 546  | WED-II | 57 | C    | 608  | PI     |
| 12 | T       | 167      | REC1   | 34 | N    | 547  | WED-II | 58 | S    | 609  | PI     |
| 13 | Y       | 168      | REC1   | 35 | K    | 548  | WED-II | 59 | T    | 610  | PI     |
| 14 | F       | 169      | REC1   | 36 | E    | 549  | WED-II | 60 | Q    | 611  | PI     |
| 15 | S       | 170      | REC1   | 37 | K    | 550  | WED-II | 61 | L    | 612  | PI     |
| 16 | G       | 171      | REC1   | 38 | N    | 551  | WED-II | 62 | K    | 613  | PI     |
| 17 | F       | 172      | REC1   | 39 | N    | 552  | WED-II | 63 | A    | 614  | PI     |
| 18 | Y       | 173      | REC1   | 40 | K    | 570  | WED-II | 64 | V    | 615  | PI     |
| 19 | E       | 174      | REC1   | 41 | Q    | 571  | WED-II |    |      |      |        |
| 20 | N       | 175      | REC1   | 42 | K    | 572  | WED-II |    |      |      |        |
| 21 | R       | 176      | REC1   | 43 | G    | 573  | WED-II |    |      |      |        |
| 22 | K       | 177      | REC1   | 44 | Y    | 595  | WED-II |    |      |      |        |
|    |         |          |        | 45 | D    | 596  | WED-II |    |      |      |        |
|    |         |          |        | 46 | Y    | 597  | WED-II |    |      |      |        |

**Supplementary Table 2** | List of guide sequences used for BLISS and indel analysis.

| <b>Figure</b> | <b>Gene or Description</b> | <b>PAM</b> | <b>Guide</b>                   |
|---------------|----------------------------|------------|--------------------------------|
| Fig. 1C       | Plasmid interference       | Varies     | CCGATGGTCCATGTCTGTTACTCGCCTGTC |
| Fig. 2A       | <i>VEGFA</i>               | TATC       | AAATTCCAGCACCGAGCGCCCTG        |
| Fig. 2B       |                            |            |                                |
| Fig. S2       |                            |            |                                |
| Fig. 2B       | <i>DNMT1</i>               | TATA       | AAGAAATATTACAACATATAAAA        |
| Fig. 3D       |                            |            |                                |
| Fig. 2C       | <i>DNMT1</i>               | TCCC       | GTCACCCCTGTTTCTGGCACCAG        |
| Fig. 3D       |                            |            |                                |
| Fig. 2C       | <i>DNMT1</i>               | TTCC       | TGGTGCCAGAAACAGGGGTGACG        |
| Fig. 3D       |                            |            |                                |
| Fig. 2D       | <i>In vitro</i> cleavage   | NNNN       | GAGAAGTCATTTAATAAGGCCACT       |
| Fig. 2G       | <i>CFTR</i>                | TATA       | GCAGTTGTCGCAGTTTTACAACC        |
| Fig. 2G       | <i>CFTR</i>                | TATG       | ACCCGGATAACAAGGAGGAACGC        |
| Fig. 2G       | <i>CFTR</i>                | TATA       | GAGTTGATTGGATTGAGAATAGA        |
| Fig. 2G       | <i>CFTR</i>                | TATC       | GCCTCTCCCTGCTCAGAATCTGG        |
| Fig. 2G       | <i>VEGFA</i>               | TATG       | TAGCTGTTTGGGAGGTCAGAAAT        |
| Fig. 2G       | <i>VEGFA</i>               | TATA       | GACATGTCCCATTTGTGGGAACT        |
| Fig. 2G       | <i>VEGFA</i>               | TATG       | TTCGGGTGCTGTGAACTTCCCTC        |
| Fig. 2G       | <i>EMX1</i>                | TATG       | ACCCACTGCGTGGGTTC CATGA        |
| Fig. 2G       | <i>EMX1</i>                | TATC       | CCAAGTCAA ACTTCTCTTCAGTC       |
| Fig. 2G       | <i>EMX1</i>                | TATA       | CCCTTTAGGACACATGCTGTCTA        |
| Fig. 2G       | <i>DNMT1</i>               | TATC       | AGTGCACCTTCGGCGTGCTGCAG        |
| Fig. 2G       | <i>DNMT1</i>               | TATA       | CCCACCATGACAGGAAGAACGGC        |
| Fig. 2G       | <i>DNMT1</i>               | TATG       | AGGCGCTTCCCCAGCACAACTG         |
| Fig. 2H       | <i>CFTR</i>                | TTCG       | GCGATGTTTTTTCTGGAGATTTA        |
| Fig. 2H       | <i>DNMT1</i>               | TTCA       | GCTAAAATAAAGGAGGAGGAAGC        |
| Fig. 2H       | <i>DNMT1</i>               | TCCC       | GTCACCCCTGTTTCTGGCACCAG        |
| Fig. 2H       | <i>DNMT1</i>               | TTCC       | TGGTGCCAGAAACAGGGGTGACG        |
| Fig. 2H       | <i>DNMT1</i>               | TTCA       | GTCTCCGTGAACGTTCCCTTAGC        |
| Fig. 2H       | <i>DNMT1</i>               | TTCA       | CGGAGACTGAACACTCCTCAAAC        |
| Fig. 2H       | <i>EMX1</i>                | TTCG       | TGGCAATGCGCCACCGGTTGATG        |
| Fig. 2H       | <i>VEGFA</i>               | TTCC       | CTGTGGTGGCCGAGCGCCCCCTA        |
| Fig. 2H       | <i>VEGFA</i>               | TCCA       | GTCCCAAATATGTAGCTGTTTGG        |
| Fig. 2H       | <i>VEGFA</i>               | TCCG       | CACGTAACCTCACTTTCCTGCTC        |
| Fig. 2H       | <i>VEGFA</i>               | TCCC       | TCTTTAGCCAGAGCCGGGGTGTG        |
| Fig. 2H       | <i>VEGFA</i>               | TCCG       | CCCCCGAAACTCTGTCCAGAGA         |
| Fig. 2H       | <i>VEGFA</i>               | TCCG       | GGGGCGGATGGGTAATTTTCAGG        |
| Fig. 2H       | <i>VEGFA</i>               | TCCA       | ATAGATCTGTGTGTCCCTCTCCC        |

|         |              |      |                           |
|---------|--------------|------|---------------------------|
| Fig. 2H | <i>VEGFA</i> | TTCC | AAAGCCCATTCCCTCTTTAGCCA   |
| Fig. 2H | <i>VEGFA</i> | TCCC | CCCACCCCCTTTCCAAAGCCCAT   |
| Fig. 2H | <i>CFTR</i>  | GTCG | AAAATTTTACACCACAAAATGTT   |
| Fig. 2H | <i>CFTR</i>  | ACCA | AAGATGATATTTTCTTTAATGGT   |
| Fig. 2H | <i>CFTR</i>  | ACCA | TTAAAGAAAATATCATCTTTGGT   |
| Fig. 2H | <i>CFTR</i>  | ATCC | TAAACTCATTAAATGCCCTTCGGC  |
| Fig. 2H | <i>CFTR</i>  | ATCC | AGGAAAACACTGAGAACAGAATGAA |
| Fig. 2H | <i>EMX1</i>  | ATCA | CATCAACCGGTGGCGCATTGCCA   |
| Fig. 2H | <i>EMX1</i>  | GTCC | TCCCCATTGGCCTGCTTCGTGGC   |
| Fig. 2H | <i>EMX1</i>  | CCCG | GGCTTCAAGCCCTGTGGGGCCAT   |
| Fig. 2H | <i>EMX1</i>  | ATCG | ATGTCACCTCCAATGACTAGGGT   |
| Fig. 2H | <i>EMX1</i>  | ATCG | ATGTCCTCCCCATTGGCCTGCTT   |
| Fig. 2H | <i>VEGFA</i> | CCCA | TTCCCTCTTTAGCCAGAGCCGGG   |
| Fig. 2H | <i>VEGFA</i> | CTCG | GCCACCACAGGGAAGCTGGGTGA   |
| Fig. 2H | <i>VEGFA</i> | GTCC | CAAATATGTAGCTGTTTGGGAGG   |
| Fig. 2H | <i>VEGFA</i> | GCCG | AGCGCCCCCTAGTGACTGCCGTC   |
| Fig. 2H | <i>VEGFA</i> | GCCC | ATTCCCTCTTTAGCCAGAGCCGG   |
| Fig. 2H | <i>VEGFA</i> | CCCG | GCTCTGGCTAAAGAGGGAATGGG   |
| Fig. 2H | <i>VEGFA</i> | GCCA | GAGCCGGGGTGTGCAGACGGCAG   |
| Fig. 2H | <i>VEGFA</i> | CTCG | CTCCATTCACCCAGCTTCCCTGT   |
| Fig. 2H | <i>VEGFA</i> | GTCA | GAAATAGGGGGTCCAGGAGCAAA   |
| Fig. 2H | <i>VEGFA</i> | CTCC | AGTCCCAAATATGTAGCTGTTTG   |
| Fig. 2H | <i>VEGFA</i> | GCCC | TGGGCTCTCTGTACATGAAGCAA   |
| Fig. 2H | <i>VEGFA</i> | ACCA | CAGGGAAGCTGGGTGAATGGAGC   |
| Fig. 2H | <i>VEGFA</i> | ACCC | CGGCTCTGGCTAAAGAGGGAATG   |
| Fig. 2H | <i>VEGFA</i> | CCCA | GCTTCCCTGTGGTGGCCGAGCGC   |
| Fig. 2H | <i>VEGFA</i> | GCCG | TCTGCACACCCCGGCTCTGGCTA   |
| Fig. 2H | <i>VEGFA</i> | GCCC | CCTAGTGACTGCCGTCTGCACAC   |
| Fig. 2H | <i>VEGFA</i> | ACCC | CCTATTTCTGACCTCCCAAACAG   |
| Fig. 2H | <i>VEGFA</i> | GCCA | CCACAGGGAAGCTGGGTGAATGG   |
| Fig. 2H | <i>VEGFA</i> | GTCC | TCACTCTCGAAGACGCTGCTCGC   |
| Fig. 2H | <i>VEGFA</i> | GTCA | CTAGGGGGCGCTCGGCCACCACA   |
| Fig. 2H | <i>VEGFA</i> | GCCG | GGGTGTGCAGACGGCAGTCACTA   |
| Fig. 2H | <i>VEGFA</i> | CTCG | AAGACGCTGCTCGCTCCATTAC    |
| Fig. 2H | <i>VEGFA</i> | CCCG | CTCCAACGCCCTCAACCCACAC    |
| Fig. 2H | <i>VEGFA</i> | CTCC | TGGACCCCTATTTCTGACCTCC    |
| Fig. 2H | <i>VEGFA</i> | ATCC | TGGAGTGACCCTGGCCTTCTCC    |
| Fig. 2H | <i>VEGFA</i> | ACCC | CCTTTCCAAAGCCCATTCCCTCT   |
| Fig. 2H | <i>VEGFA</i> | CCCC | CCACCCCTTTCCAAAGCCCATT    |
| Fig. 3A | <i>VEGFA</i> | TTTG | CTAGGAATATTGAAGGGGGCAGG   |

|         |                        |      |                          |
|---------|------------------------|------|--------------------------|
| Fig. 3A | <i>GRIN2B</i>          | TTTG | GTGCTCAATGAAAGGAGATAAAGG |
| Fig. 3A | <i>DNMT1</i>           | TTTG | AAGAAATATTACAACATATAAAA  |
| Fig. 3A | <i>EMX1</i>            | TTTG | TCCTCCGGTTCTGGAACCACACC  |
| Fig. 3C |                        |      |                          |
| Fig. S5 |                        |      |                          |
| Fig. 3B | <i>RPL32P3</i>         | TTTG | GGGTGATCAGACCCAACAGCAGG  |
| Fig. S3 | <i>CFTR</i>            | TTTA | ATGGTGCCAGGCATAATCCAGGA  |
| Fig. S3 | <i>DNMT1</i>           | TTTC | CCTTCAGCTAAAATAAAGGAGGA  |
| Fig. S3 | <i>DNMT1</i>           | TTTG | AGGAGTGTTTCAGTCTCCGTGAAC |
| Fig. S3 | <i>DNMT1</i>           | TTTC | CTGATGGTCCATGTCTGTTACTC  |
| Fig. S3 | <i>DNMT1</i>           | TTTA | GCTGAAGGGAAATAAAAGGAAAA  |
| Fig. S3 | <i>EMX1</i>            | TTTG | GGGAGGCCTGGAGTCATGGCCCC  |
| Fig. S3 | <i>EMX1</i>            | TTTG | TGGTTGCCACCCTAGTCATTGG   |
| Fig. S3 | <i>VEGFA</i>           | TTTA | GCCAGAGCCGGGGTGTGCAGACG  |
| Fig. S3 | <i>VEGFA</i>           | TTTC | CAAAGCCCATTCCTCTTTAGCC   |
| Fig. S4 | <i>PCSK9</i> (Neuro2a) | TCCC | GTCCCAGGAGGATGGCCTGGCTG  |
| Fig. S4 | <i>PCSK9</i> (Neuro2a) | TCCC | AGGAGGATGGCCTGGCTGATGAG  |
| Fig. S4 | <i>PCSK9</i> (Neuro2a) | TTCA | ATCTGTAGCCTCTGGGTCTCCTC  |
| Fig. S4 | <i>PCSK9</i> (Neuro2a) | TCCC | TGGCTTCTTGGTGAAGATGAGCA  |
| Fig. S4 | <i>PCSK9</i> (Neuro2a) | TTCC | TCAATGTACTCCACATGGGGCAA  |
| Fig. S4 | <i>PCSK9</i> (Neuro2a) | TCCA | TGGGATGCTCTGGGCGAAGACAA  |
| Fig. S4 | <i>PCSK9</i> (Neuro2a) | TCCC | GATGGGCACCCTGGATGCTGGTA  |
| Fig. S4 | <i>PCSK9</i> (Neuro2a) | TCCC | GGCCGCTGACCACACCTGCCAGG  |
| Fig. S4 | <i>PCSK9</i> (Neuro2a) | CCCC | GATGGGCACCCACTGCTCTGCGT  |
| Fig. S4 | <i>PCSK9</i> (Neuro2a) | TTTG | TTCAATCTGTAGCCTCTGGGTCT  |
| Fig. S4 | <i>PCSK9</i> (Neuro2a) | TTTA | TGACCTCTTCCCTGGCTTCTTGG  |
| Fig. S4 | <i>PCSK9</i> (Neuro2a) | TTTG | TCTTCGCCCAGAGCATCCCATGG  |

**Supplementary Table 3** | List of plasmids used in the study.

| <b>Name</b> | <b>Backbone</b>  | <b>Description</b>                             | <b>Experiments Used</b>            | <b>Addgene #</b> | <b>Ref.</b>         |
|-------------|------------------|------------------------------------------------|------------------------------------|------------------|---------------------|
| pY010       | pcDNA3.1         | CMV promoter-driven AsCpf1                     | Cell lysate and indel (HEK293)     | 69982            | Zetsche et al. 2015 |
|             | pcDNA3.1         | CMV promoter-driven AsCpf1 (S542R/K607R)       | Cell lysate and indel (HEK293)     |                  |                     |
|             | pcDNA3.1         | CMV promoter-driven AsCpf1 (S542R/K548V/N552R) | Cell lysate and indel (HEK293)     |                  |                     |
| pY036       |                  | U6-crRNA(BbsI)-CBh-AsCpf1                      | BLISS (HEK293) and indel (Neuro2a) |                  |                     |
|             |                  | U6-crRNA(BbsI)-CBh-AsCpf1 (S542R/K607R)        | BLISS (HEK293) and indel (Neuro2a) |                  |                     |
|             |                  | U6-crRNA(BbsI)-CBh-AsCpf1 (S542R/K548V/N552R)  | BLISS (HEK293) and indel (Neuro2a) |                  |                     |
| pY020       |                  | U6-crRNA(BsmBI)-CMV-mCherry                    | Indel (HEK293)                     |                  |                     |
|             | pACYC (modified) | T7-AsCpf1-T7-crRNA                             | Bacterial screen                   |                  |                     |
